# Supplementary material
Source: PubMed Central journal article supplement (PMC4662384)
Supplement: NIHMS734486-supplement.pdf [file NIHMS734486-supplement.pdf]

## Supplemental Information

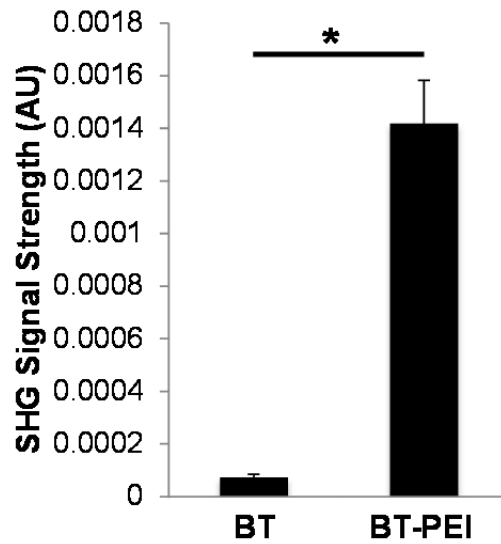

**Figure S1: PEI coating increases SHG signal of BT crystals in HeLa cells.** SHG signal from cellular uptake studies was quantified and normalized to a per cell basis and reported as the average pixel intensity per cell. Error bars represent SEM. \*  $p < 0.01$  (student's t test).
